# Supplementary material
Source: PubMed Central journal article supplement (PMC4254802)

## SUPPLEMENTAL FIGURE LEGENDS

### **Supplemental Figure 1. TIMP3 regulates TACE-mediated shedding of endogenous substrates.**

T4-2 cells were transfected with control or TIMP3 siRNA. **(A)** Endogenous TIMP3 mRNA level (upper panel) and secreted TIMP3 (lower panel) were decreased upon transfection of TIMP3 siRNA. TIMP3 mRNA was measured by qRT-PCR (upper panel), and endogenous TIMP3 in medium was assessed by concanavalin A affinity precipitation and anti-TIMP3 immunoblotting. **(B)** Endogenous T $\beta$ RI at the cell surface, revealed by cell surface biotinylation, Neutravidin precipitation, and immunoblotting. Relative T $\beta$ RI abundance at the cell surface was quantified by density scanning (lower panel). N=3 blots; t-tests were performed. \*,  $P < 0.05$ , compared with control siRNA. **(C)** Effects of increasing amounts of TIMP3, added for 30 min, on PMA-induced shedding of endogenous T $\beta$ RI, revealed as in (B). Endogenous cell surface T $\beta$ RII, which is not a substrate of TACE (1), is shown as control. Relative T $\beta$ RI abundance at the cell surface was quantified by density scanning (lower panel). N=4 blots; t-tests were performed. \*,  $P < 0.01$ , compared with PMA treatment without TIMP3. **(D)** Endogenous TGF- $\alpha$  secreted into in medium, released after 60 min treatment of cells with PMA or anisomycin. Soluble TGF- $\alpha$  was quantified by ELISA. N=3 ELISA assays; t-tests were performed. \*,  $P < 0.01$ , compared with control siRNA.

### **Supplemental Figure 2. ADAM10 forms dimers at the cell surface.**

**(A)** C $\alpha$  cells expressing Myc-tagged ADAM10 and Flag-tagged ADAM10, T $\beta$ RII or TACE were analyzed by anti-Flag immunoprecipitation and anti-Myc immunoblotting, revealing

association of Myc-tagged with Flag-tagged ADAM10. **(B)** C $\alpha$  cells were treated with sulfo-EGS or control solvent, and endogenous ADAM10 was visualized by immunoblotting of concanavalin A affinity-purified proteins, showing monomers and presumed dimers. **(C)** C $\alpha$  cells were treated simultaneously with sulfo-EGS and EZ-link sulfo-NHS-LC-biotin. Biotinylated cell surface proteins were adsorbed to Neutravidin beads, and endogenous ADAM10 was visualized by immunoblotting (upper panel). The remaining cell lysate was subjected to concanavalin A affinity purification and anti-ADAM10 immunoblotting (middle panel). Relative dimer and monomer abundance of TACE at the cell surface versus the supernatant (lane 2) were quantified by density scanning (lower panel), N=3 blots.

**Supplemental Figure 3A:** The TACE dimer, visualized following treatment of the cells with the cross-linker DSP, is absent after disulfide reduction. C $\alpha$  cells expressing TACE were treated with the membrane-permeable DSP or control solvent, prior to cell lysis and concanavalin A affinity precipitation, thus enriching glycosylated proteins, including TACE. TACE was visualized by immunoblotting after reducing or non-reducing SDS-PAGE, showing TACE monomers and TACE dimers in cells treated with DSP, but no dimers upon reduction.

**Supplemental Figure 3B:** HepG2 cells expressing Myc-tagged and Flag-tagged TACE were treated with PMA or anisomycin without or with the MEK inhibitor U0126 or p38 MAPK inhibitor SB203580. Anti-Flag immunoprecipitated proteins were immunoblotted with anti-Myc or anti-Flag to visualize dimerization of Myc-tagged with Flag-tagged TACE.

Myc-tagged TACE expression was shown by immunoblotting of cell lysates.

**Supplemental Figure 3C:** HepG2 cells expressing Myc-tagged and Flag-tagged TACE were treated with PMA without or with the matrix metalloprotease inhibitor TAPI-1. Anti-Flag immunoprecipitated proteins were immunoblotted with anti-Myc or anti-Flag to visualize Myc-tagged TACE association with Flag-tagged TACE. Immunoblotting of cell lysates revealed the expression of Myc-tagged TACE.

**Supplemental Figure 3D:** Dimer levels of wild-type, cysteine-trap and control mutant TACE. C $\alpha$  cells expressing TACE wild-type, cysteine-trap, or its control mutant were subjected to cross-linking with sulfo-EGS. Glycosylated proteins including TACE were enriched by concanavalin A beads, and immunoblotted using anti-TACE antibody (upper panel). A short exposure of the same experiment shows the expression level of wild-type and mutant TACE (lower panel).

**Supplemental Figure 3E:** Cell surface levels of wild-type, cysteine-trap and control mutant TACE. C $\alpha$  cells expressing TACE wild-type, cysteine-trap or control mutant TACE were subjected to cell surface biotinylation. Biotinylated proteins were adsorbed to Neutravidin beads, and immunoblotted using anti-Flag antibody (upper panel). The supernatants were adsorbed to concanavalin A beads, and analyzed by immunoblotting using anti-Flag antibody, to evaluate the total TACE expression (lower panel).

**Supplemental Figure 3F:** HepG2 cells were transfected with control or TACE siRNA, and treated with PMA or anisomycin for 30 min, or the MAPK inhibitors U0126 or SB203580 for 3 h, as indicated, and their in vitro shedding activity was assessed by anti-TACE immunopurification and ELISA. N=3 ELISA assays; t-tests were performed. \*,  $P < 0.05$ , \*\*  $P < 0.01$ , compared with control siRNA and solvent treatment.

**Supplemental Figure 3G:** Cα cells expressing Flag-tagged wild-type, cysteine-trap, control mutant TACE, or TACE-B/ADAM10cyto chimera, with Myc-tagged TIMP3 were lysed and subjected to anti-Flag immunoprecipitation, followed by anti-Myc immunoblotting. The expression levels of TACE and TIMP3 in cell lysates, and TIMP3 in the conditioned media, were shown by immunoblotting. Ratios of TACE:TIMP3 association were obtained by density scanning. N=3 experiments; t-tests were performed. \*,  $P < 0.01$ , compared with wild-type TACE.

1. Liu, C., P. Xu, S. Lamouille, J. Xu, and R. Derynck. 2009. TACE-mediated ectodomain shedding of the type I TGF-beta receptor downregulates TGF-beta signaling. *Mol Cell* 35:26-36.

# Supplemental Figure 1

**A**

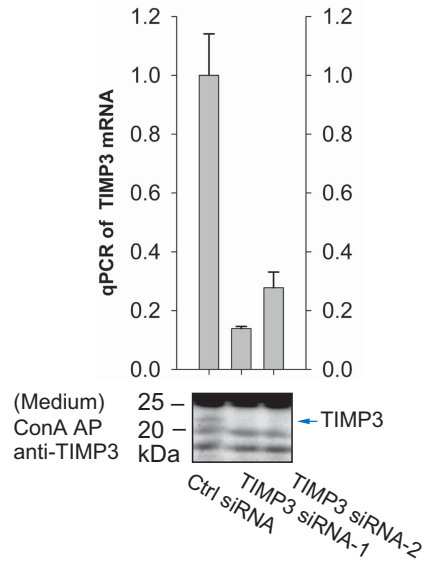

**B**

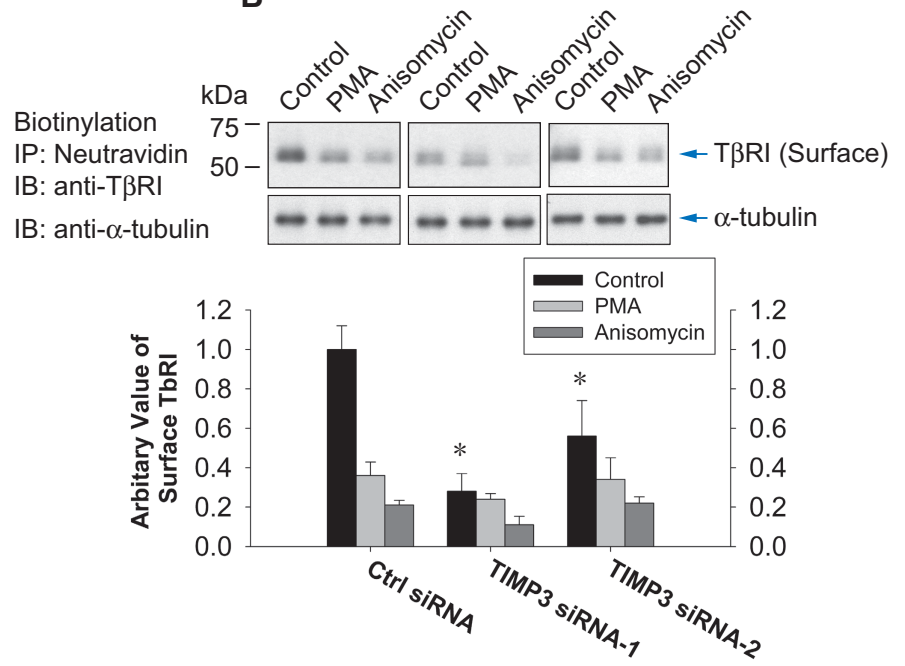

**C**

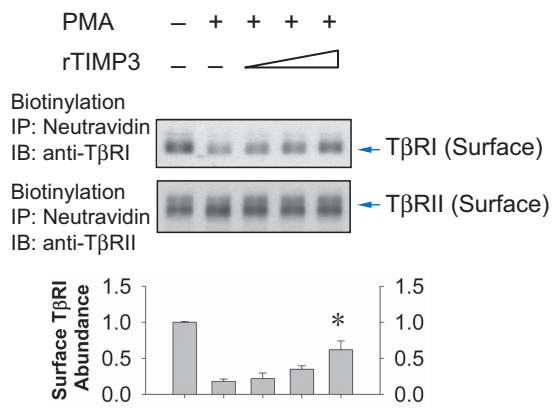

**D**

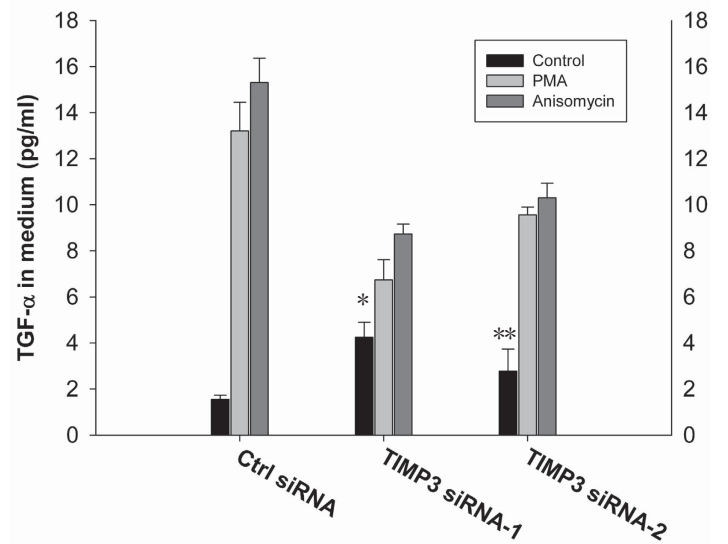

**A**

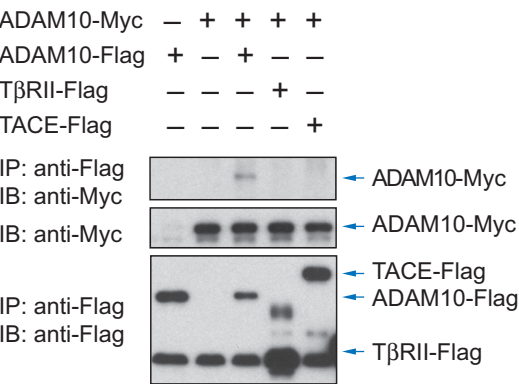

**B**

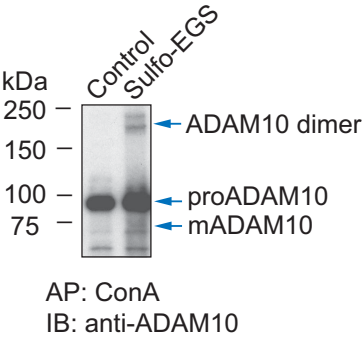

**C**

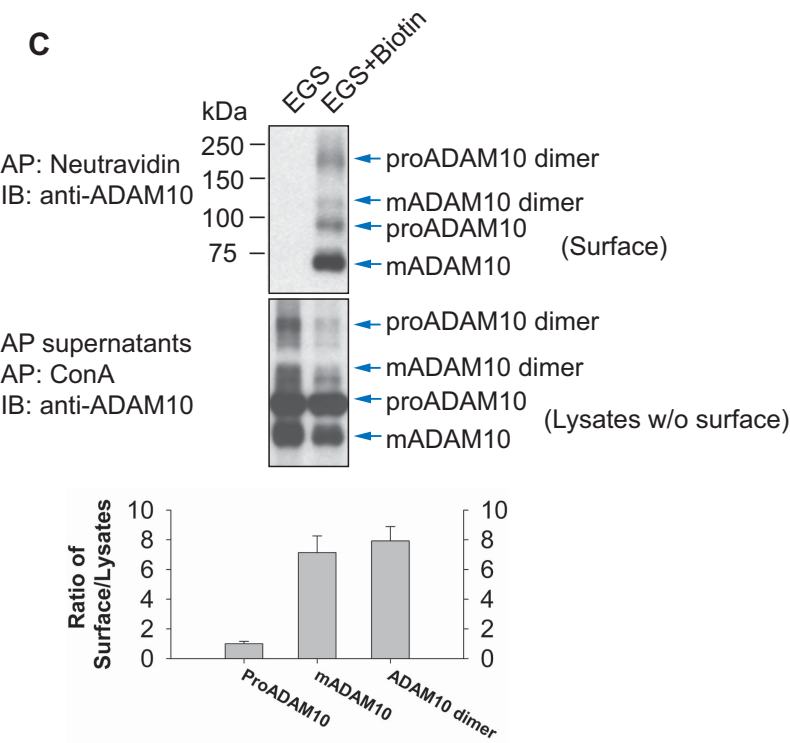

A

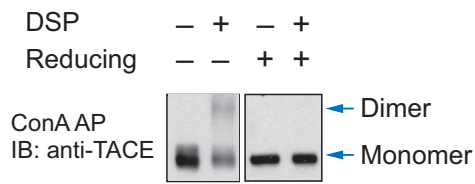

C

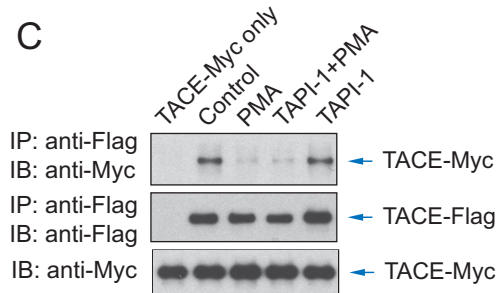

D

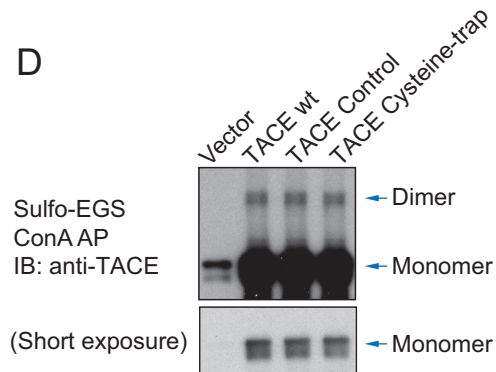

F

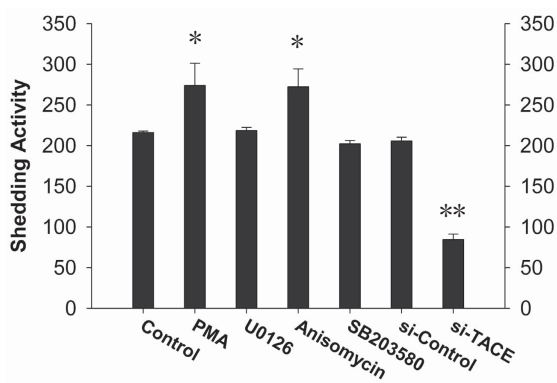

B

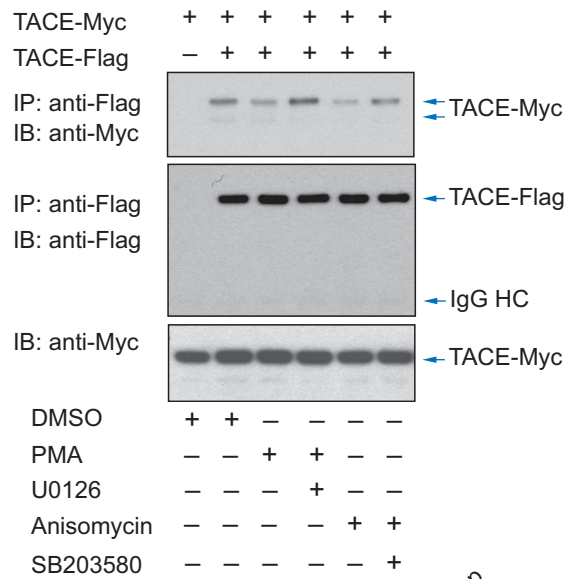

E

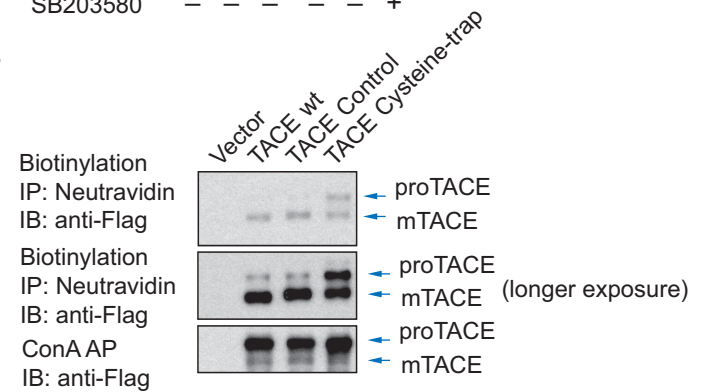

G

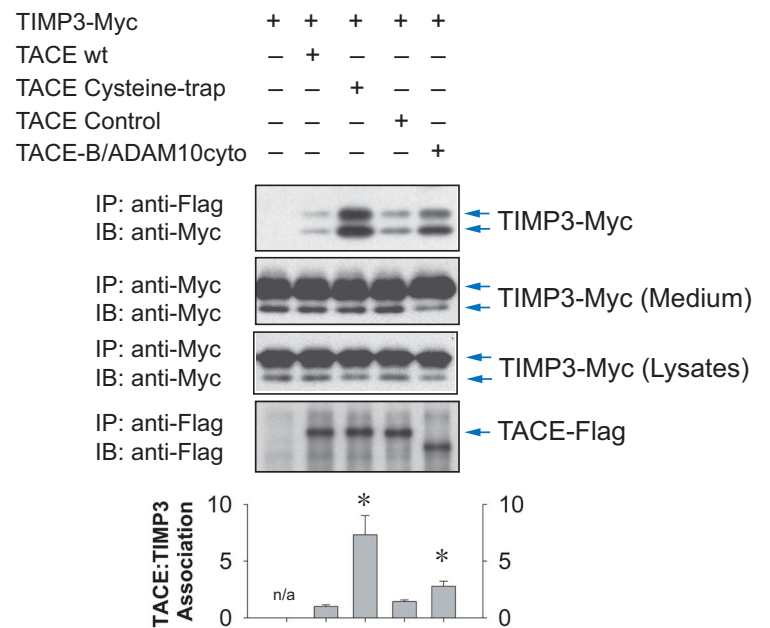

Supplement: NIHMS641023-supplement-Supplmental_info.pdf [file NIHMS641023-supplement-Supplmental_info.pdf]
